# Supplementary material for: Ectopic or Over-Expression of Class 1 Phytoglobin Genes Confers Flooding Tolerance to the Root Nodules of Lotus japonicus by Scavenging Nitric Oxide
Source: PubMed Central journal article supplement (PMC6681080; doi:10.3390/antiox8070206), 2019-07-04
Supplement: antioxidants-08-00206-s001.pdf [file antioxidants-08-00206-s001.pdf]

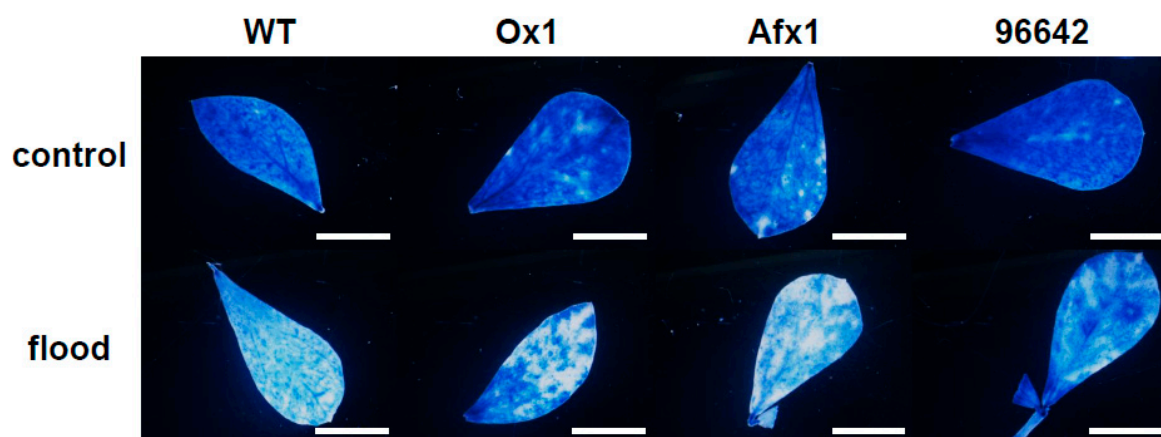

**Figure S1.** In situ superoxide staining with NBT. Scale bars, 5 mm.

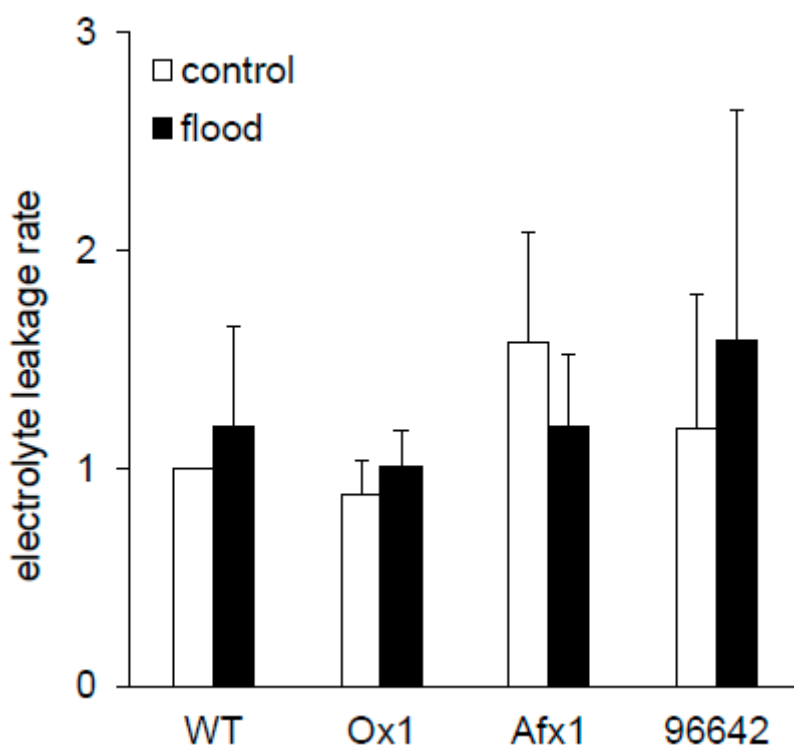

**Figure S2.** Electrolyte leakage rate during flooding of detached leaves. Bars indicate the ratio to the control WT. No significant differences were detected by Student's *t*-test ( $p < 0.05$ ).

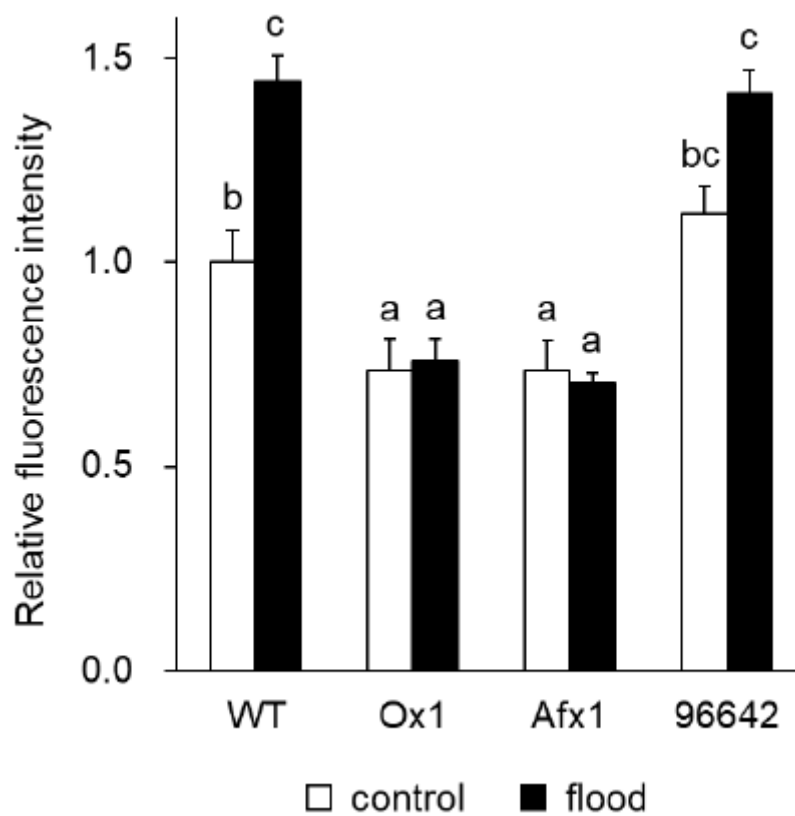

**Figure S3.** Effect of flooding on the relative amount of ROS in roots. CellROX fluorescence images (Figure 6) were quantified with the image analysis software ImageJ. Values are means  $\pm$  SE of nine biological replicates. Means denoted by the same letter do not differ significantly by Student's *t*-test ( $p < 0.05$ ).
